# Supplementary material for: Latent Tuberculosis Infection Treatment Completion while Shifting Prescription from Isoniazid-Only to Rifampicin-Containing Regimens: A Two-Decade Experience in Milan, Italy
Source: MDPI journal article supplement (doi:10.3390/jcm9010101), 2019-12-31
Supplement: s1 [file s1]

**Table S1.** Reasons behind the assessment of LTBI treated in groups treated with INH-alone or RIF-containing regimens before 2010 (*n*=11490).

|                         | Total        | Patients initially treated with INH-alone regimen | Patients initially treated with RIF-containing regimens |                                  |
|-------------------------|--------------|---------------------------------------------------|---------------------------------------------------------|----------------------------------|
|                         | <i>n</i> (%) | <i>n</i> (%)                                      | <i>n</i> (%)                                            | <i>p</i> -value <sup>&amp;</sup> |
| <b>Total</b>            | 11490        | 11 373                                            | 117                                                     |                                  |
| <b>LTBI assessment</b>  |              |                                                   |                                                         |                                  |
| Recent TB contact†      | 5920 (51.5)  | 5828 (51.2)                                       | 92 (78.6)                                               | <0.0001                          |
| Screening programs for: |              |                                                   |                                                         |                                  |
| Homeless                | 1378 (12.0)  | 1375 (12.1)                                       | 3 (2.6)                                                 | <0.0001                          |
| Irregular migrants      | 1330 (11.6)  | 1326 (11.7)                                       | 4 (3.4)                                                 | 0.003                            |
| Asylum seekers/refugees | 0 (0.0)      | 0 (0.0)                                           | 0 (0.0)                                                 | -                                |
| HCWs                    | 1091 (9.5)   | 1086 (9.6)                                        | 5 (4.3)                                                 | 0.05                             |
| Clinical risk groups    | 401 (0.5)    | 389 (3.4)                                         | 12 (10.3)                                               | <0.0001                          |
| School                  | 329 (2.9)    | 329 (2.9)                                         | 0 (0.0)                                                 | 0.08                             |
| Workers                 | 1030 (9.0)   | 1030 (9.1)                                        | 0 (0.0)                                                 | <0.0001                          |
| Adoption                | 7 (0.1)      | 7 (0.1)                                           | 0 (0.0)                                                 | 1.00                             |
| Military service        | 0 (0.0)      | 0 (0.0)                                           | 0 (0.0)                                                 | -                                |
| PWID                    | 20 (0.2)     | 20 (0.2)                                          | 1 (0.9)                                                 | 0.19                             |

† Any patients could be classified to be recent tuberculosis contact or not. <sup>&</sup>Statistical comparison between patients initially treated with INH-alone and with RIF-containing regimens. HCW, healthcare workers; INH, isoniazid; LTBI, latent tuberculosis infection; PWID, people who injects drugs; RIF, rifampicin; TB, tuberculosis.

**Table S2.** Reasons behind the assessment of LTBI treated in groups treated with INH-alone or RIF-containing regimens after 2009 (*n*=8180).

|                         | Total        | Patients initially treated with INH-alone regimen | Patients initially treated with RIF-containing regimens |                                  |
|-------------------------|--------------|---------------------------------------------------|---------------------------------------------------------|----------------------------------|
|                         | <i>n</i> (%) | <i>n</i> (%)                                      | <i>n</i> (%)                                            | <i>p</i> -value <sup>&amp;</sup> |
| <b>Total</b>            | 8180         | 4232                                              | 3948                                                    |                                  |
| <b>LTBI assessment</b>  |              |                                                   |                                                         |                                  |
| Recent TB contact†      | 3413 (41.7)  | 2565 (60.6)                                       | 848 (21.5)                                              | <0.0001                          |
| Screening programs for: |              |                                                   |                                                         |                                  |
| Homeless                | 1530 (18.7)  | 298 (7.0)                                         | 1232 (31.2)                                             | <0.0001                          |
| Irregular migrants      | 296 (3.6)    | 129 (3.1)                                         | 167 (4.2)                                               | 0.004                            |
| Asylum seekers/refugees | 1318 (16.1)  | 5 (0.1)                                           | 1313 (33.3)                                             | <0.0001                          |
| HCWs                    | 610 (7.5)    | 445 (10.5)                                        | 165 (4.2)                                               | <0.0001                          |
| Clinical risk groups    | 990 (12.1)   | 773 (18.3)                                        | 217 (5.5)                                               | <0.0001                          |
| School                  | 9 (0.1)      | 2 (0.1)                                           | 7 (0.2)                                                 | 0.10                             |
| Workers                 | 3 (0.04)     | 2 (0.05)                                          | 1 (0.03)                                                | 1.00                             |
| Adoption                | 11 (0.1)     | 9 (0.2)                                           | 2 (0.05)                                                | 0.07                             |
| Military service        | 9 (0.1)      | 6 (0.1)                                           | 3 (0.1)                                                 | 0.51                             |
| PWID                    | 1 (0.01)     | 1 (0.02)                                          | 0 (0.0)                                                 | 1.00                             |

† Any patients could be classified to be recent tuberculosis contact or not. <sup>&</sup>Statistical comparison between patients initially treated with INH-alone and with RIF-containing regimens. HCW, healthcare workers; INH, isoniazid; LTBI, latent tuberculosis infection; PWID, people who injects drugs; RIF, rifampicin; TB, tuberculosis.

**Table S3.** Comparison of demographic characteristics between patient treated before 2010 and after 2009 (*n* = 19670).

|                         | Total        | Patients treated before 2010 | Patients treated after 2009 |                 |
|-------------------------|--------------|------------------------------|-----------------------------|-----------------|
|                         | <i>n</i> (%) | <i>n</i> (%)                 | <i>n</i> (%)                | <i>p</i> -value |
| <b>Total</b>            | 19670        | 11490                        | 8180                        |                 |
| <b>Sex</b>              |              |                              |                             |                 |
| Males                   | 11562 (58.8) | 6297 (54.8)                  | 5265 (64.4)                 | <0.0001         |
| Females                 | 8108 (41.2)  | 5193 (45.2)                  | 2915 (35.6)                 |                 |
| <b>Median (IQR) age</b> | 29 (23–37)†  | 29 (23–35)‡                  | 30 (22–43)^                 | <0.0001         |
| <b>Nationality</b>      |              |                              |                             |                 |

|                                     |              |             |             |         |
|-------------------------------------|--------------|-------------|-------------|---------|
| Foreign-born                        | 14414 (73.3) | 8309 (72.3) | 6105 (74.6) | <0.0001 |
| <b>Geographical area of origin</b>  |              |             |             |         |
| Italy                               | 5256 (26.7)  | 3181 (27.7) | 2075 (25.4) | <0.0001 |
| Western Europe<br>/Northern America | 19 (0.1)     | 1 (0.01)    | 18 (0.22)   | <0.0001 |
| Eastern Europe                      | 1744 (8.9)   | 985 (8.6)   | 759 (9.3)   | 0.09    |
| Southern America                    | 3843 (19.5)  | 2727 (23.7) | 1116 (13.6) | <0.0001 |
| Asia                                | 2900 (14.7)  | 1699 (14.8) | 1201 (14.7) | 0.84    |
| Africa                              | 5907 (30.0)  | 2897 (25.2) | 3010 (36.8) | <0.0001 |
| Unknown                             | 1 (0.00)     | -           | 1 (0.01)    | -       |

†Data are not available for 91 (0.5 %) patients. ‡ Data are not available for 84 (0.7 %) patients. ^Data are not available for 7 (0.09 %) patients. INH, isoniazid; IQR, interquartile range; LTBI, latent tuberculosis infection; RIF, rifampicin; TB, tuberculosis.

**Table S4.** Comparison of demographic characteristics between patients treated with INH-alone and those with RIF-containing regimens after 2009 (*n*=8180).

|                                     | Total        | Patients initially<br>treated with INH-<br>alone regimen | Patients initially treated<br>with RIF-containing<br>regimens |                 |
|-------------------------------------|--------------|----------------------------------------------------------|---------------------------------------------------------------|-----------------|
|                                     | <i>n</i> (%) | <i>n</i> (%)                                             | <i>n</i> (%)                                                  | <i>p</i> -value |
| <b>Total</b>                        | 8180         | 4232                                                     | 3948                                                          |                 |
| <b>Sex</b>                          |              |                                                          |                                                               |                 |
| Males                               | 5265 (64.4)  | 2200 (52.0)                                              | 3065 (77.6)                                                   |                 |
| Females                             | 2915 (35.6)  | 2032 (48.0)                                              | 883 (22.4)                                                    | <0.0001         |
| <b>Median (IQR) age†</b>            | 30 (22-43)   | 36 (25-51)                                               | 26 (20-32)                                                    | <0.0001         |
| <b>Nationality</b>                  |              |                                                          |                                                               |                 |
| Foreign-born                        | 6105 (74.6)  | 2630 (62.2)                                              | 3475 (88.0)                                                   | <0.0001         |
| <b>Geographical area of origin</b>  |              |                                                          |                                                               |                 |
| Italy                               | 2075 (25.4)  | 1602 (37.9)                                              | 473 (12.0)                                                    | <0.0001         |
| Western Europe<br>/Northern America | 18 (0.2)     | 12 (0.3)                                                 | 6 (0.2)                                                       | 0.21            |
| Eastern Europe                      | 759 (9.3)    | 487 (11.5)                                               | 272 (6.9)                                                     | <0.0001         |
| Southern America                    | 1116 (13.6)  | 861 (20.3)                                               | 255 (6.5)                                                     | <0.0001         |
| Asia                                | 1201 (14.7)  | 609 (14.4)                                               | 592 (15.0)                                                    | 0.44            |
| Africa                              | 3010 (36.8)  | 661 (15.6)                                               | 2349 (59.5)                                                   | <0.0001         |
| Unknown                             | 1 (0.01)     | -                                                        | 1 (0.03)                                                      | -               |

†Data are not available for 7 (0.09 %) patients. INH, isoniazid; IQR, interquartile range; LTBI, latent tuberculosis infection; RIF, rifampicin; TB, tuberculosis.

**Table S5.** Comparison of treatment outcomes in patients with adverse events without and with therapy changes (*n*=2631).

|                      | Patients with<br>adverse events | Without therapy changes | With therapy changes |                 |
|----------------------|---------------------------------|-------------------------|----------------------|-----------------|
|                      | <i>n</i> (%)                    | <i>n</i> (%)            | <i>n</i> (%)         | <i>p</i> -value |
|                      | 2631                            | 2303                    | 328                  |                 |
| Treatment completion | 1852 (70.4)                     | 1586 (68.9)             | 266 (81.1)           | <0.0001         |
| Lost to follow-up    | 90 (3.4)                        | 84 (3.7)                | 6 (1.8)              | 0.09            |
| Default              | 267 (10.2)                      | 257 (11.2)              | 10 (3.1)             | <0.0001         |
| Suspension           | 408 (15.5)                      | 371 (16.1)              | 37 (11.3)            | 0.02            |
| Transfer out         | 2 (0.1)                         | 2 (0.1)                 | 0 (0.0)              | 1.00            |
| Died                 | 1 (0.04)                        | 1 (0.04)                | 0 (0.00)             | 1.00            |
| Unknown              | 11 (0.4)                        | 2 (0.1)                 | 9 (2.7)              | <0.0001         |

**Table S6.** Dropout rates in individuals exposed to preventive treatment, without changes of drug regimen.

| Follow-up visits      | INH-alone regimen<br><i>n</i> /N (%) | 95% CI    | RIF-containing regimens<br><i>n</i> /N (%) | 95% CI    |
|-----------------------|--------------------------------------|-----------|--------------------------------------------|-----------|
| <b>Total</b>          |                                      |           |                                            |           |
| (First-*)Intermediate | 2297/15161                           | 14.6–15.8 | 444/3997                                   | 10.1–12.1 |

|                           |                      |           |                    |           |
|---------------------------|----------------------|-----------|--------------------|-----------|
|                           | (15.2)               |           | (11.1)             |           |
| Second-Intermediate*      | 3197/15161<br>(21.1) | 20.5–21.8 | –                  | –         |
| Final                     | 3280/15161<br>(21.6) | 21.0–22.3 | 557/3997<br>(13.9) | 12.8–15.0 |
| <b>Homeless</b>           |                      |           |                    |           |
| (First-*)Intermediate     | 526/1658<br>(31.7)   | 29.5–33.9 | 252/1221<br>(20.6) | 18.3–22.9 |
| Second-Intermediate*      | 717/1658<br>(43.2)   | 40.8–45.6 | –                  | –         |
| Final                     | 731/1658<br>(44.1)   | 41.7–46.5 | 280/1221<br>(22.9) | 20.5–25.3 |
| <b>HCWs</b>               |                      |           |                    |           |
| (First-*)Intermediate     | 246/1501<br>(16.4)   | 14.5–18.3 | 8/163<br>(4.9)     | 1.6–8.2   |
| Second-Intermediate*      | 320/1501<br>(21.3)   | 19.2–23.4 | –                  | –         |
| Final                     | 328/1501<br>(21.9)   | 19.8–24.0 | 10/163<br>(6.1)    | 2.4–9.8   |
| <b>Recent TB contacts</b> |                      |           |                    |           |
| (First-*)Intermediate     | 991/8155<br>(12.2)   | 11.5–12.9 | 41/921<br>(4.5)    | 3.2–5.8   |
| Second-Intermediate*      | 1413/8155<br>(17.4)  | 16.6–18.2 | –                  | –         |
| Final                     | 1454/8155<br>(17.9)  | 17.1–18.7 | 89/921<br>(9.7)    | 7.8–11.6  |

\* Refers only to INH-alone regimen. CI, confident interval; HCW, health care worker; INH, isoniazid; RIF, rifampicin; TB, tuberculosis

**Table S7.** Dropout rates in individuals exposed to preventive treatment with INH-alone regimen before 2010 and after 2009.

| Follow-up visits     | INH-alone regimen<br><i>n</i> / <i>N</i> (%) | Patients treated before 2010<br><i>n</i> / <i>N</i> (%) | Patients treated after 2009<br><i>n</i> / <i>N</i> (%) | <i>p</i> -value |
|----------------------|----------------------------------------------|---------------------------------------------------------|--------------------------------------------------------|-----------------|
| <b>Total</b>         |                                              |                                                         |                                                        |                 |
| (First-)Intermediate | 2297/15161<br>(15.2)                         | 1812/11300 (16.0)                                       | 485/3861 (12.6)                                        | <0.0001         |
| Second-Intermediate  | 3197/15161<br>(21.1)                         | 2507/11300 (22.2)                                       | 690/3861 (17.9)                                        | <0.0001         |
| Final                | 3280/15161<br>(21.6)                         | 2574/11300 (22.8)                                       | 706/3861 (18.3)                                        | <0.0001         |

INH, isoniazid

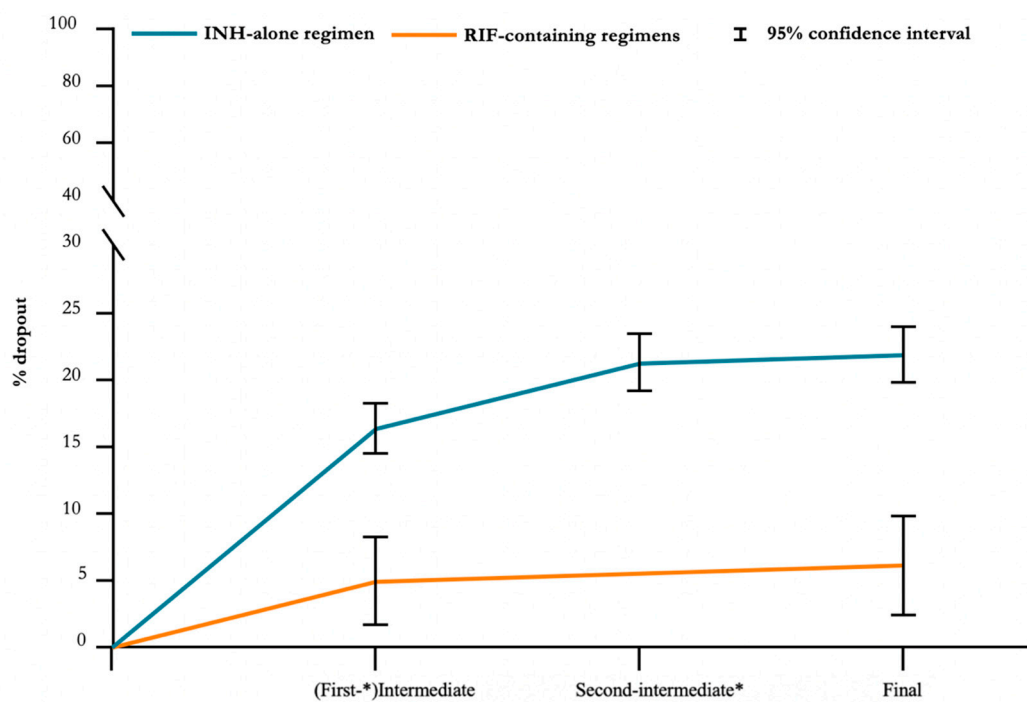

**Figure S1.** Dropout rate in recent TB contacts (n=9076). \* Refers to INH-alone regimen.

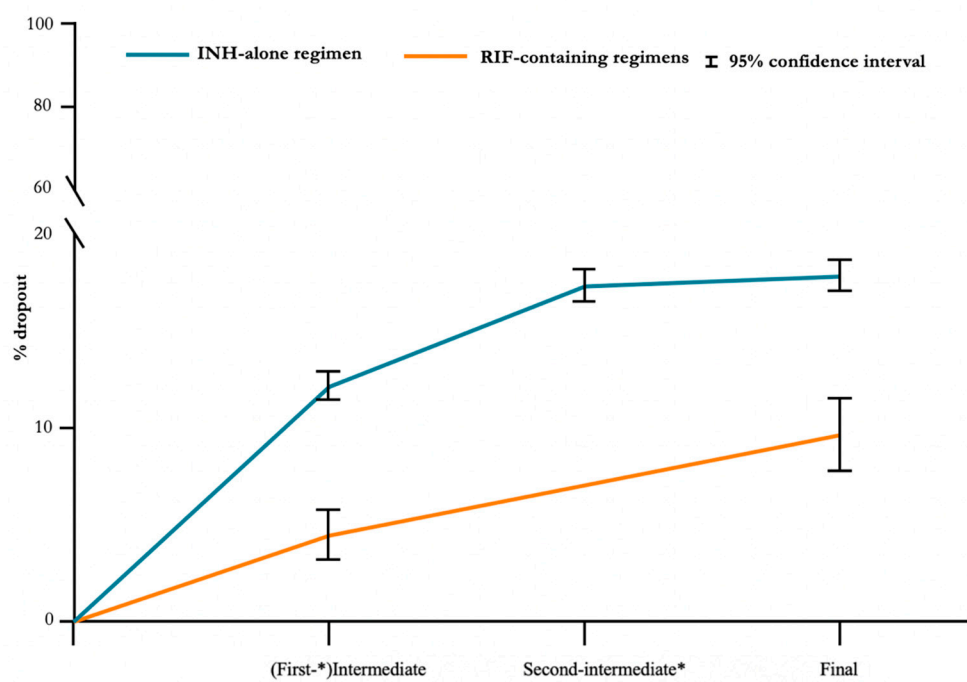

**Figure S2.** Dropout rate in homeless (n=2879). \* Refers to INH-alone regimen.

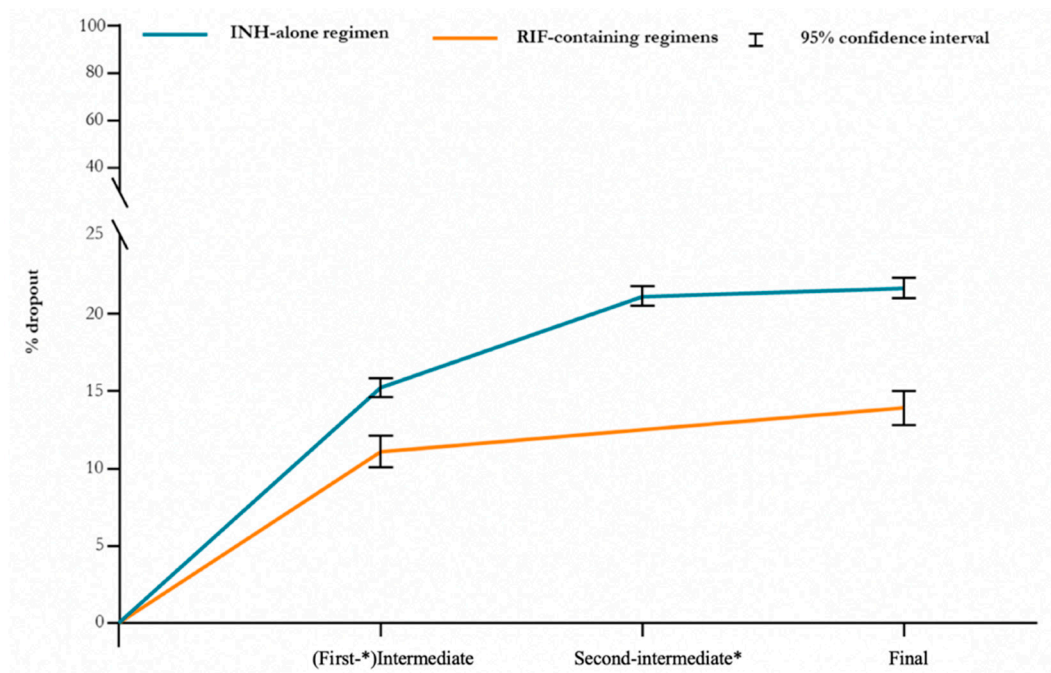

**Figure S3.** Dropout rate in health care workers ( $n = 1664$ ). \* Refers to INH-alone regimen.
